# Supplementary material for: The Application of Bony Labyrinth Methods for Forensic Affinity Estimation
Source: MDPI journal article supplement (doi:10.3390/biology11071088), 2022-07-21
Supplement: s1 [file s1]

Supplementary Materials

# The Application of Bony Labyrinth Methods for Forensic Affinity Estimation

Alexandra Uhl, Fotios Alexandros Karakostis and Katerina Harvati

**Table S1.** Measurement abbreviation list of the bony labyrinth semicircular canals and cochlea\*. All measurements were taken in mm.

| Abbreviation | Measurement                                  |
|--------------|----------------------------------------------|
| ASChM        | Anterior Canal height                        |
| ASCwM        | Anterior Canal width                         |
| ASCMR        | Anterior Canal mean radius                   |
| ASChw        | Anterior Canal height/width                  |
| LSChM        | Lateral Canal height                         |
| LSCwM        | Lateral Canal width                          |
| LSCMR        | Lateral Canal mean radius                    |
| LSChw        | Lateral Canal height/width                   |
| PSChM        | Posterior Canal width                        |
| PSCwM        | Posterior Canal width                        |
| PSCMR        | Posterior Canal mean radius                  |
| PSChw        | Posterior Canal height/width                 |
| ChM          | Cochlear height                              |
| CwM          | Cochlear width                               |
| CMR          | Cochlear mean radius                         |
| ChwM         | Cochlear height/width                        |
| SLI          | Sagittal Labyrinthine index (SLIs+SLIi x100) |

\*For more details on measurements please see [18, 28].

**Table S2.** Error test results of raw measurements in mm. Five individuals were measured three times each.

| Variable | Average Error | S.D. | Percent Error |
|----------|---------------|------|---------------|
| ASCh     | 5.96          | 0.09 | 1.51          |
| ASCw     | 6.72          | 0.05 | 0.76          |
| ASCdh    | 6.69          | 0.10 | 1.47          |
| ASCdw    | 6.40          | 0.07 | 1.06          |
| PSCh     | 6.33          | 0.19 | 3.04          |
| PSCw     | 5.80          | 0.05 | 0.85          |
| LSCh     | 4.73          | 0.06 | 1.36          |
| LSCw     | 4.94          | 0.08 | 1.55          |
| Coh      | 5.10          | 0.17 | 3.35          |
| Cow      | 4.32          | 0.08 | 1.89          |
| SLIs     | 3.08          | 0.03 | 0.85          |
| SLIi     | 2.88          | 0.04 | 1.28          |
